# Supplementary material
Source: PubMed Central journal article supplement (PMC3719390)

## Growth Inhibition of Human Colon Carcinoma Cells by Sesquiterpenoids and Tetralones of *Zygogynum calothyrsum*

Krishna P. Devkota, David Covell, Tanya Ransom, James B. McMahon, and John A. Beutler

**Figure S1.** 1D and 2D NMR spectra of 1 $\beta$ -*O*-*p*-hydroxy-*E*-cinnamoyl-isodrimeninol (**1**)

**Figure S2.** <sup>1</sup>H and <sup>13</sup>C NMR spectra of 1 $\beta$ -*O*-*p*-hydroxy-*E*-cinnamoyl-5 $\alpha$ -isodrimeninol (**2**)

**Figure S3.** <sup>1</sup>H and <sup>13</sup>C NMR spectra of 11,12-dimethoxy-11,12-epoxydrimane (**3**)

**Figure S4.** <sup>1</sup>H and 2D NMR spectra of 3'-dehydroxyisozygolone (**5**)

**Figure S5.** <sup>1</sup>H and <sup>13</sup>C NMR spectra of calothyrlone A (**9**)

**Figure S1.** 1D and 2D NMR spectra of 1 $\beta$ -*O*-*p*-hydroxy-*E*-cinnamoyl-isodrimeninol (**1**)  
**Figure S1.1.**  $^1\text{H}$  NMR spectrum of **1**

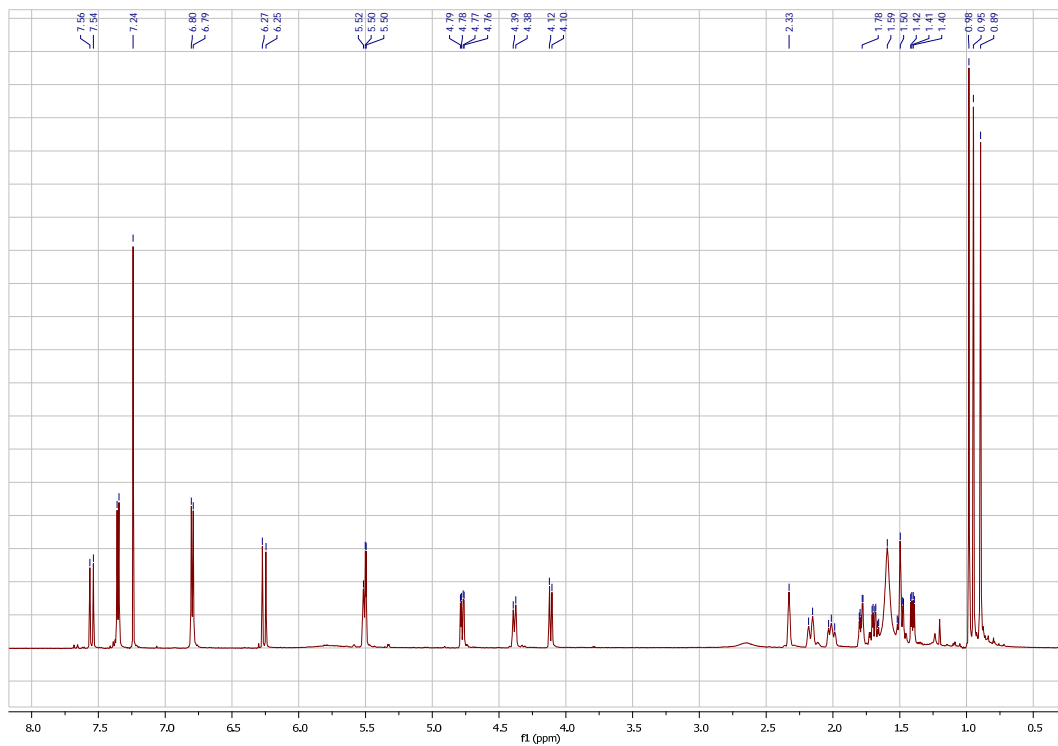

**Figure S1.2.**  $^{13}\text{C}$  NMR spectrum of **1**

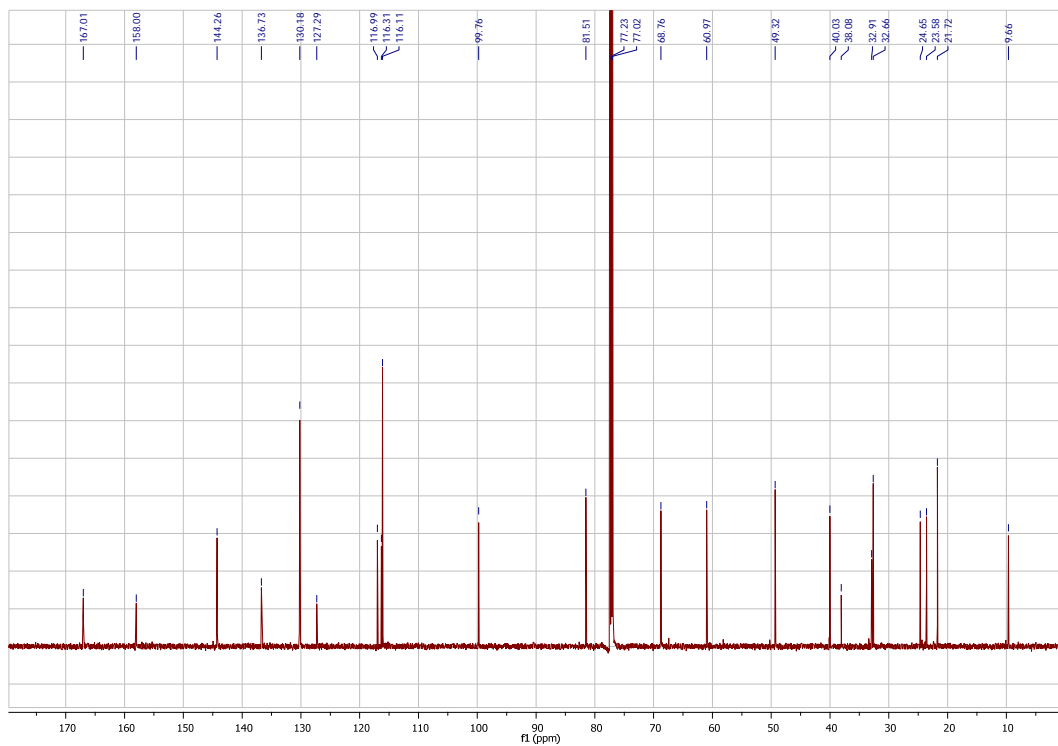

**Figure S1.3.** HSQC spectrum of **1**

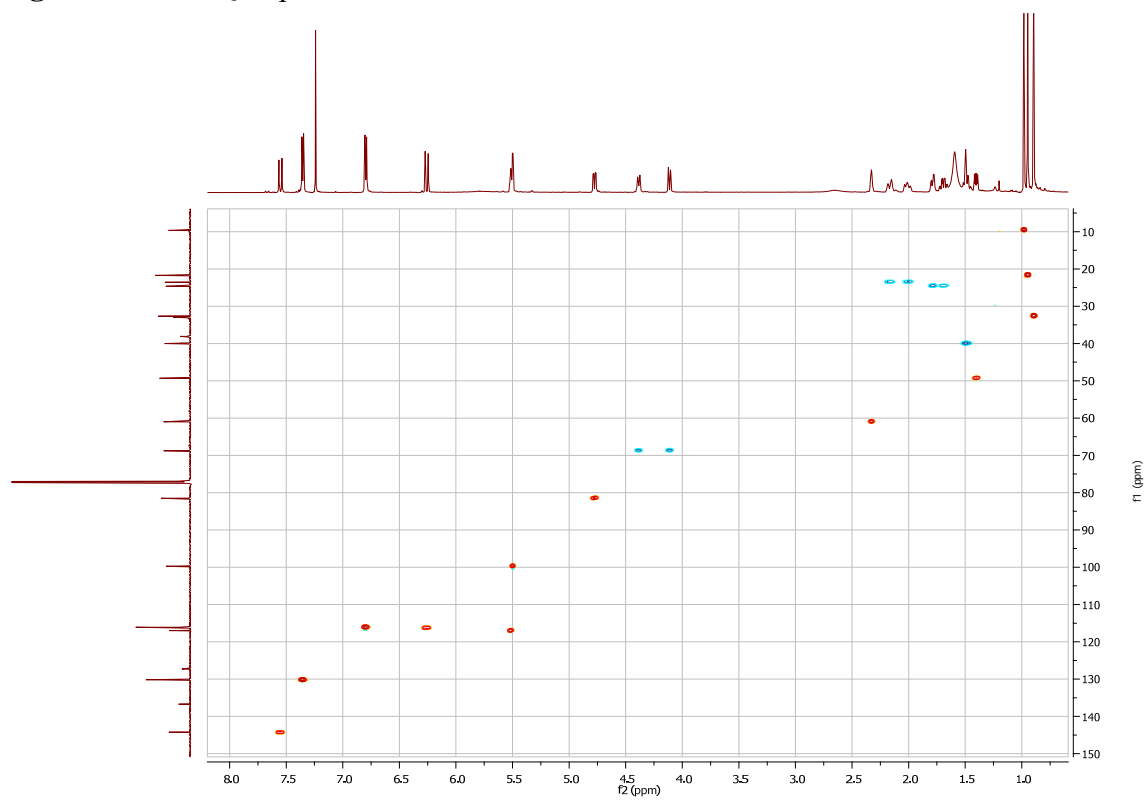

**Figure S1.4.** HMBC spectrum of **1**

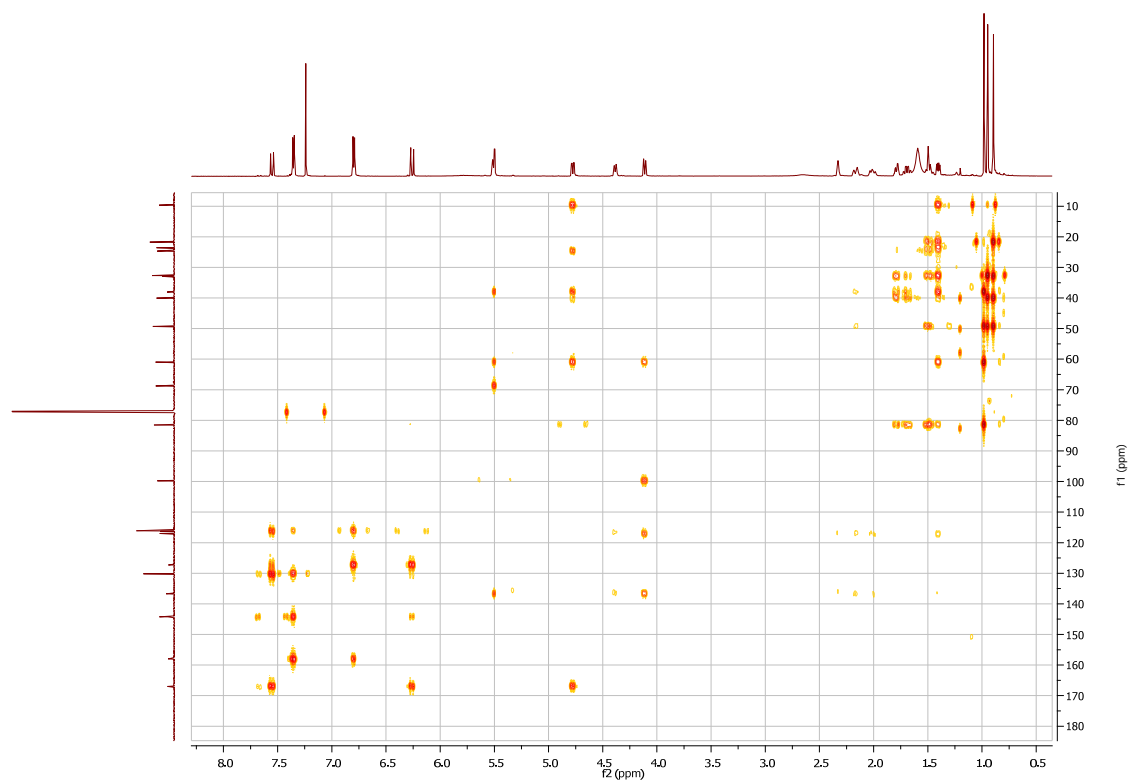

**Figure S1.5.** ROESY spectrum of **1**

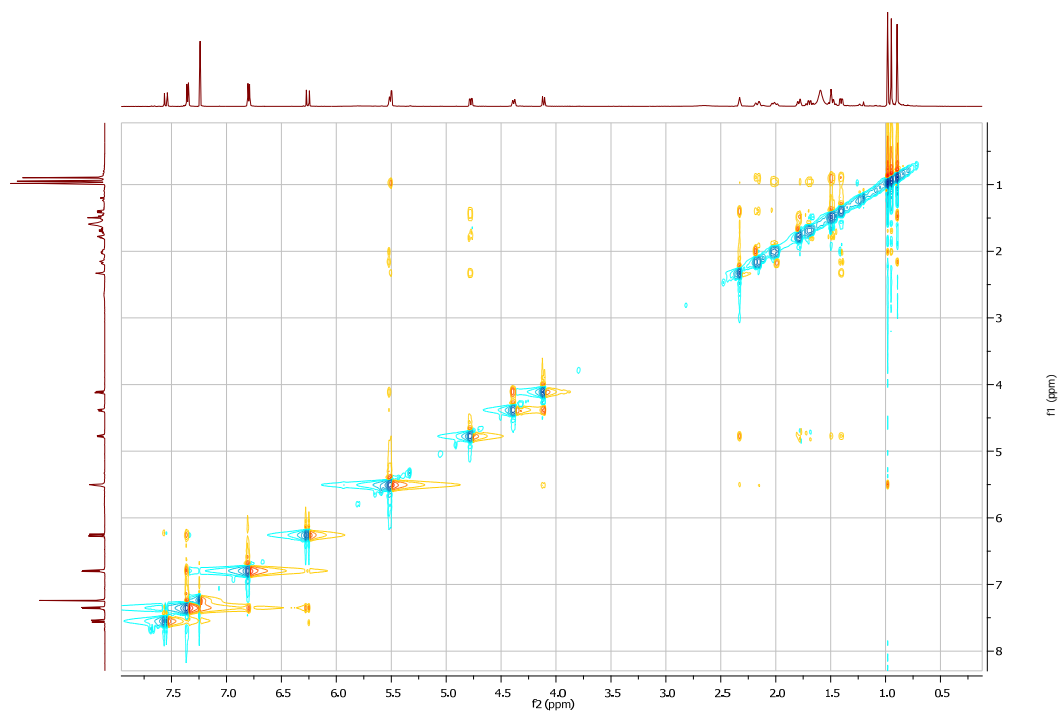

**Figure S2.**  $^1\text{H}$  and  $^{13}\text{C}$  NMR spectra of  $1\beta\text{-O-}p\text{-hydroxy-}E\text{-cinnamoyl-}5\alpha\text{-isodrimeninol}$  (**2**)

**Figure S2.1.**  $^1\text{H}$  NMR spectrum of **2**

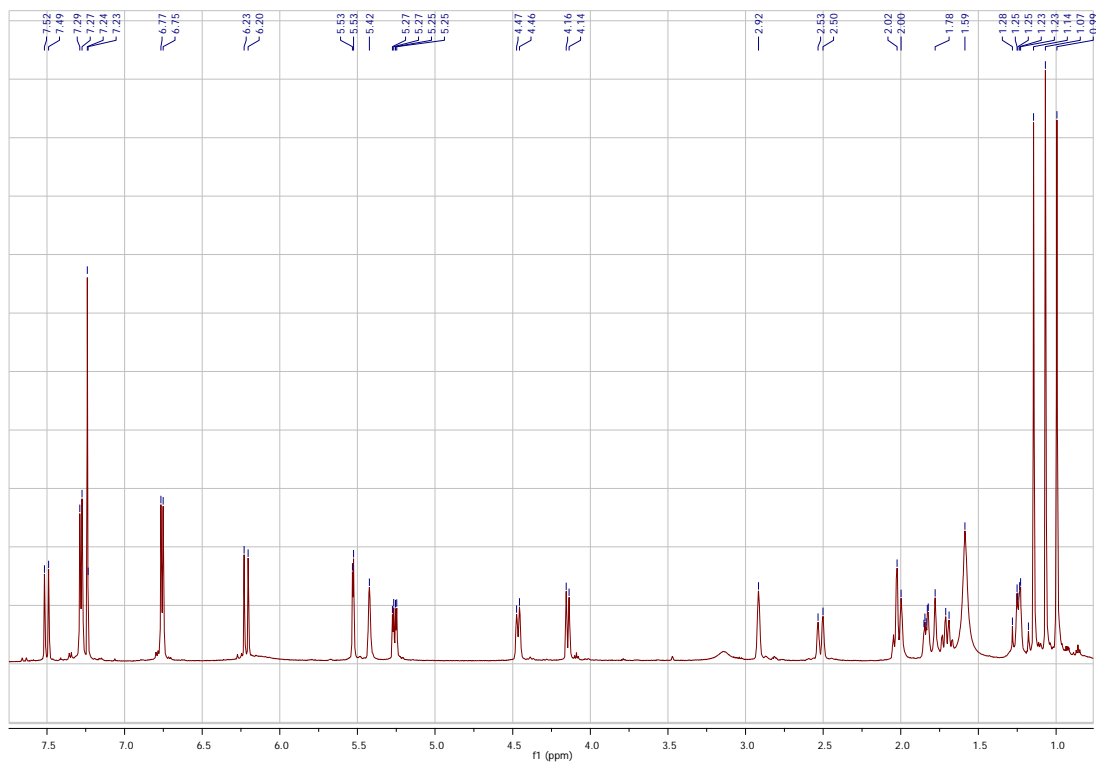

**Figure S2.2.**  $^{13}\text{C}$  NMR spectrum of **2**

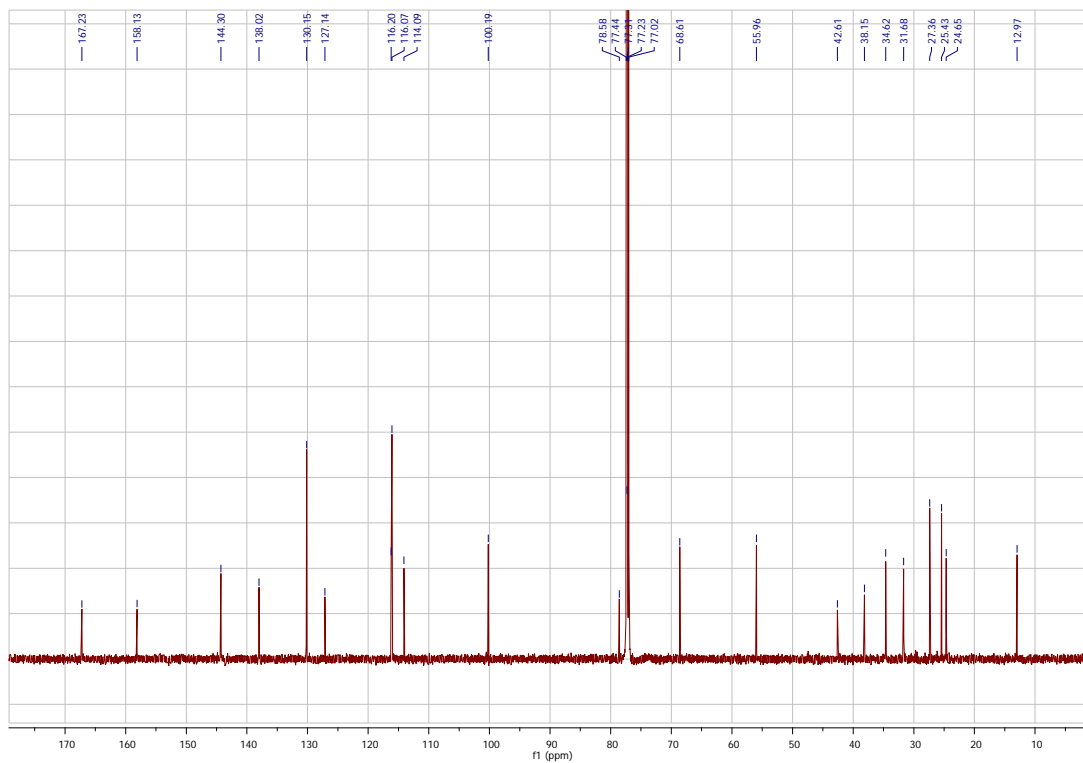

**Figure S3.**  $^1\text{H}$  and  $^{13}\text{C}$  NMR spectra of  $1\beta\text{-O-}p\text{-hydroxy-}E\text{-cinnamoyl-}11\beta,12\alpha\text{-dimethoxy-isodrimene (3)}$

**Figure S3.1.**  $^1\text{H}$  NMR spectrum of **3**

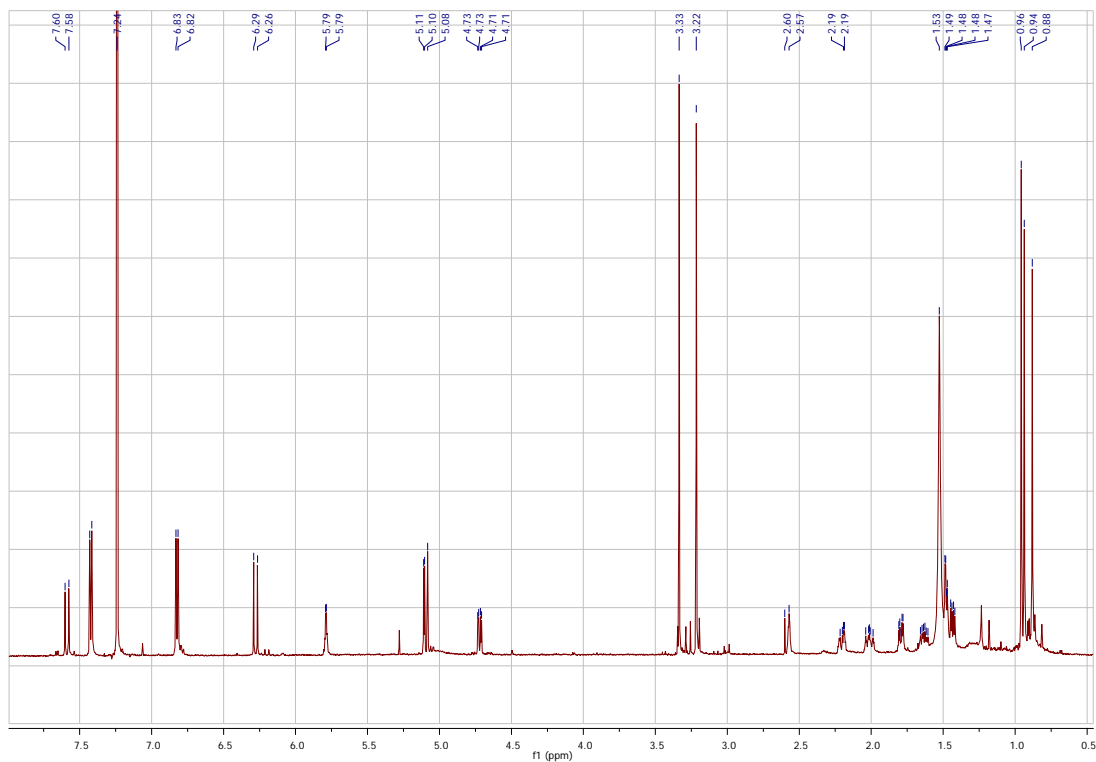

**Figure S3.2.**  $^{13}\text{C}$  NMR spectrum of **3**

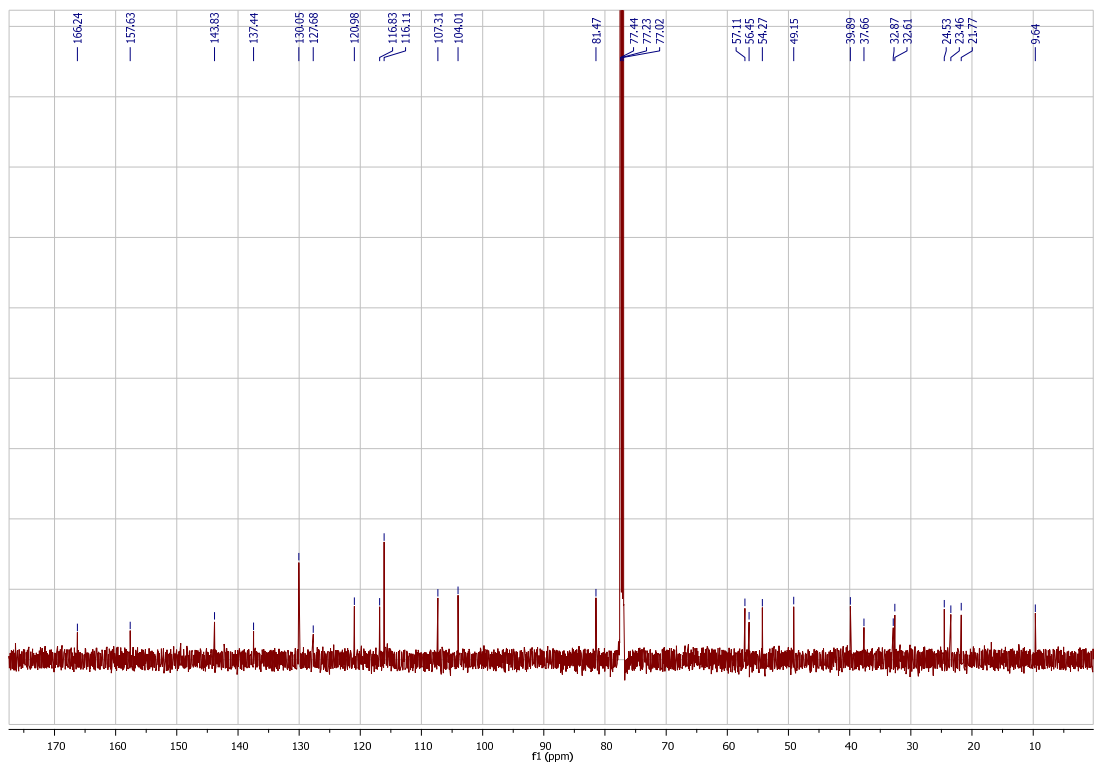

**Figure S4.**  $^1\text{H}$  and 2D NMR spectra of 3'-dehydroxyisozygolone (**5**)  
**Figure S4.1.**  $^1\text{H}$  NMR spectrum of **5**

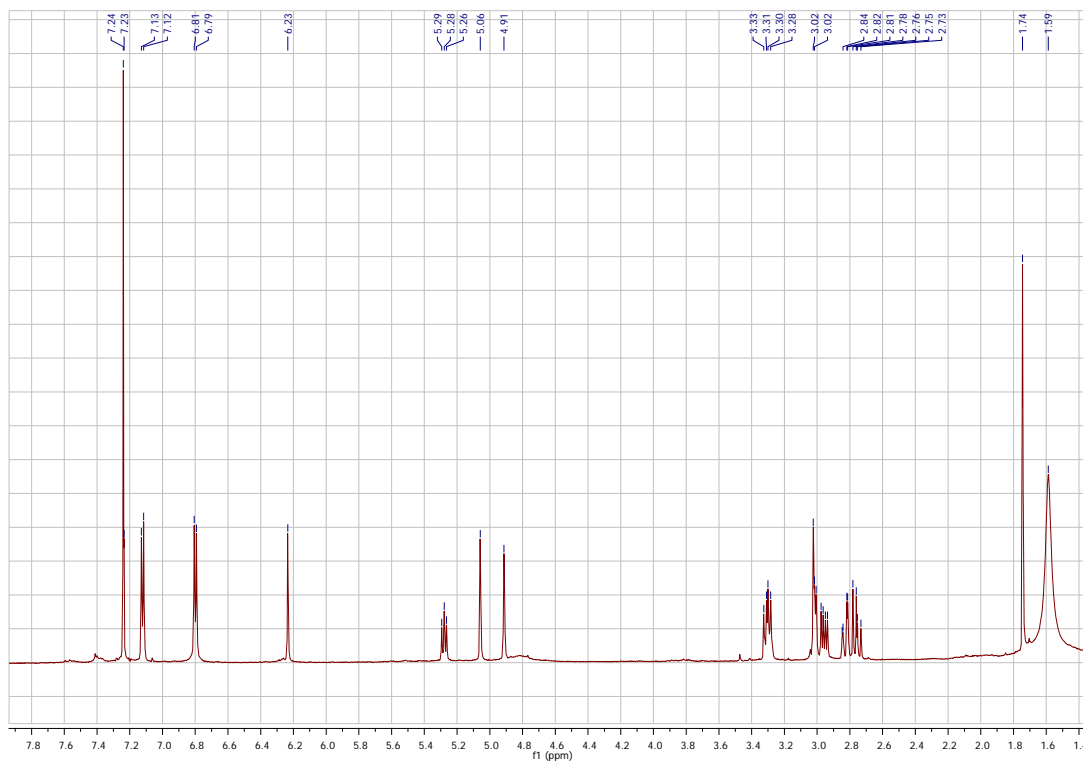

**Figure S4.2.**  $^{13}\text{C}$  NMR spectrum of **5**

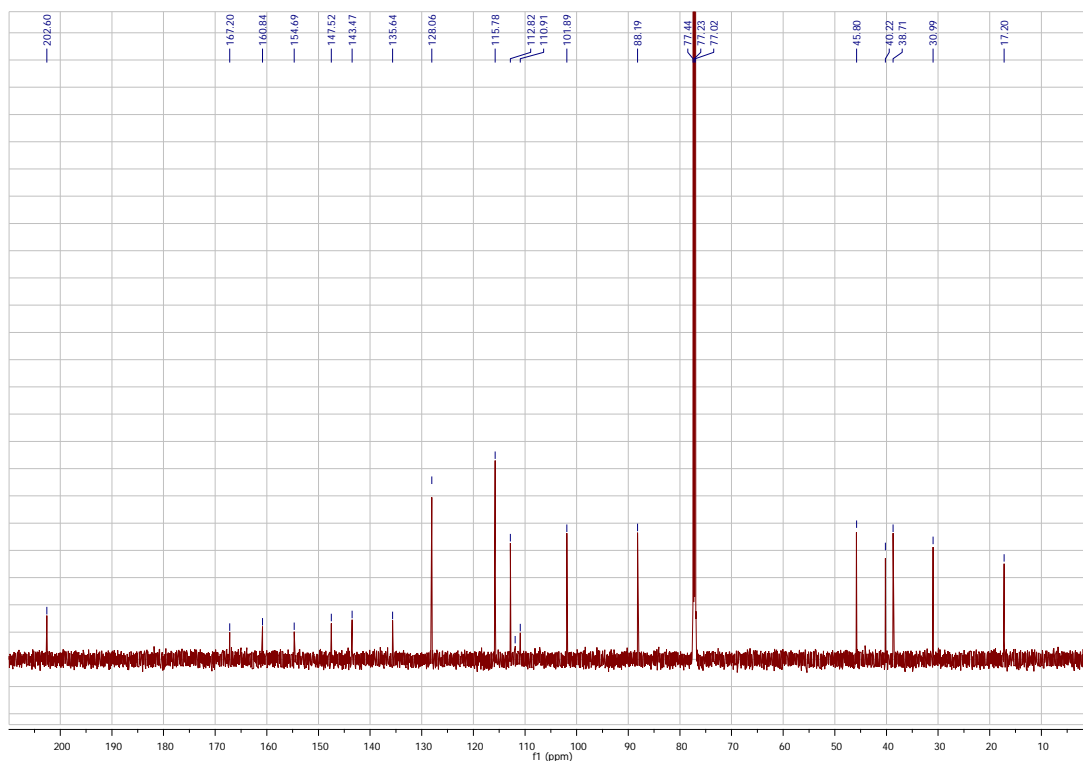

**Figure S4.3.** HSQC spectrum of **5**

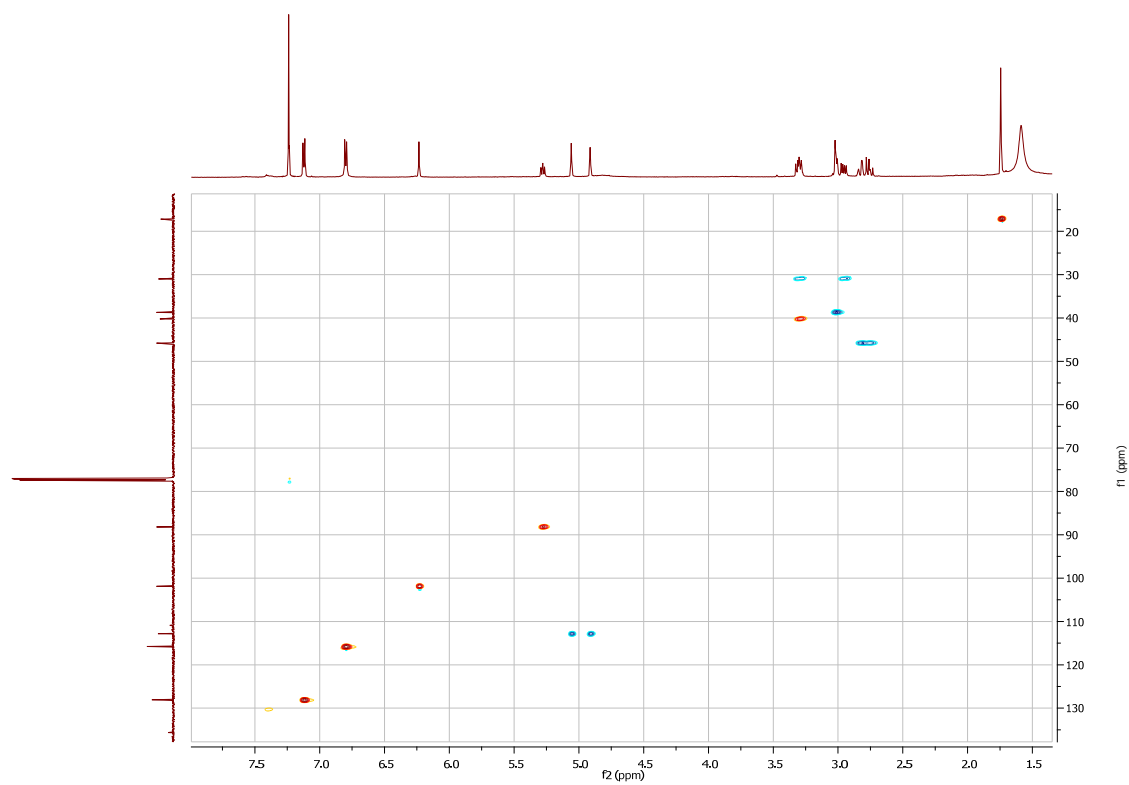

**Figure S4.3.** HMBC spectrum of **5**

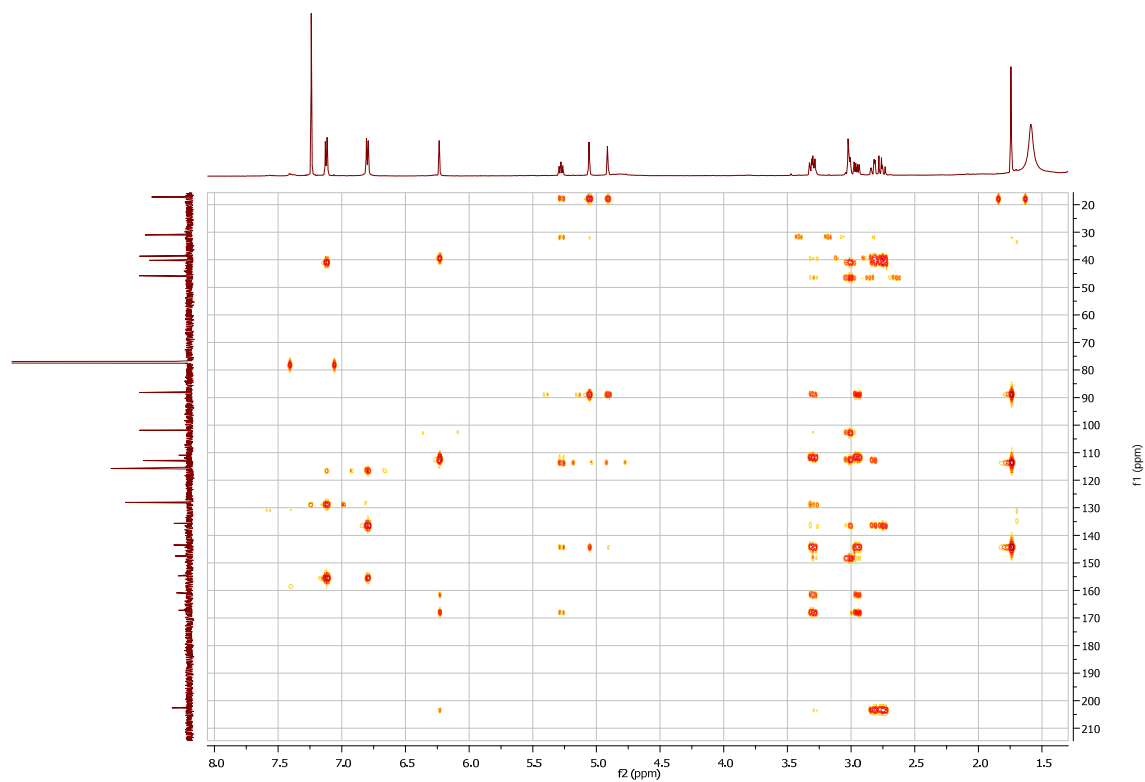



**Figure S5.**  $^1\text{H}$  and  $^{13}\text{C}$  NMR spectra of calothyrlone A (**9**)

**Figure S5.1.**  $^1\text{H}$  NMR spectrum of **9**

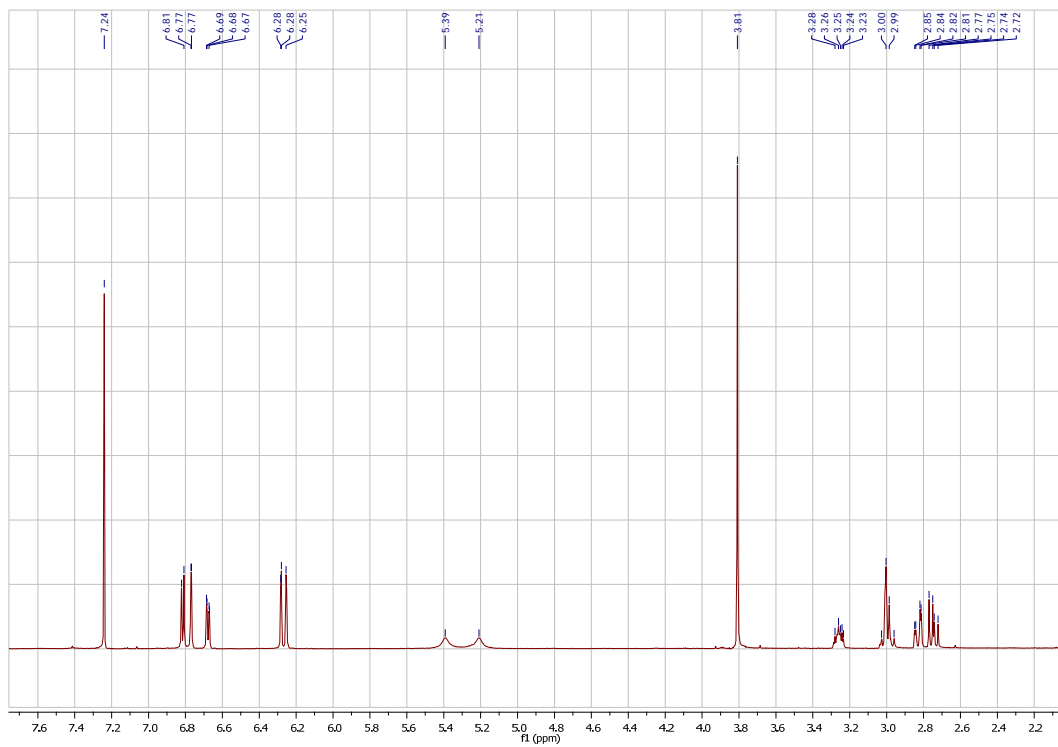

**Figure S5.2.**  $^{13}\text{C}$  NMR spectrum of **9**

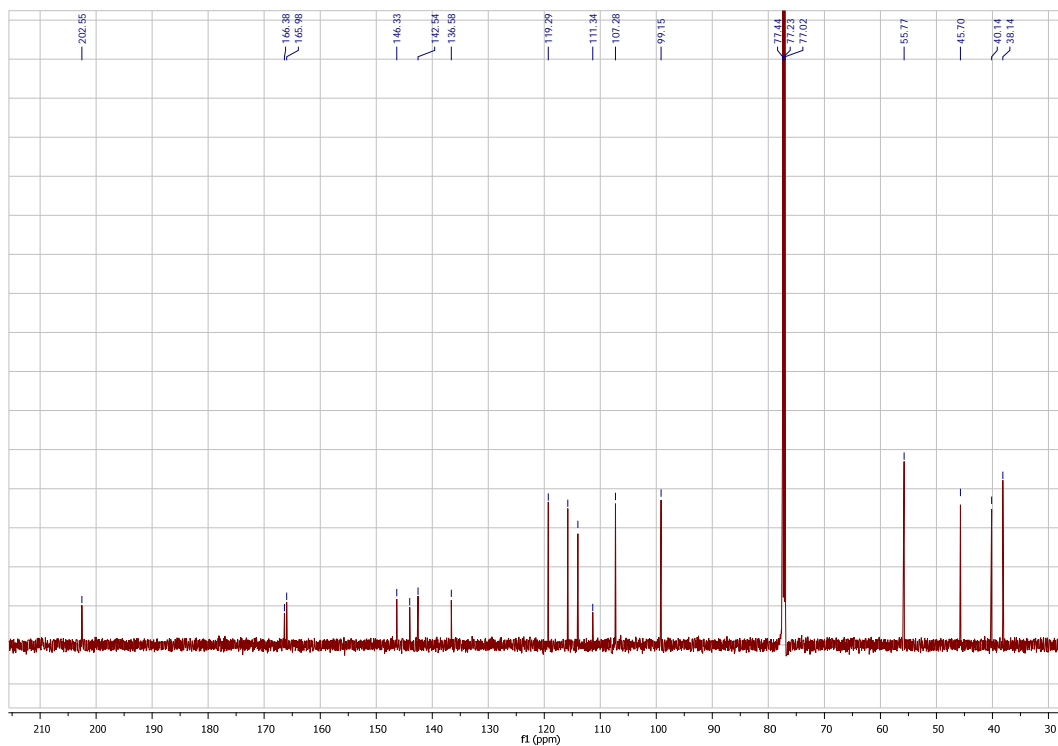

Supplement: NIHMS491149-supplement-Supplemental_Info.pdf [file NIHMS491149-supplement-Supplemental_Info.pdf]
